# Supplementary material for: A metacontinuum model for phase gradient metasurfaces
Source: Springer Nature journal article supplement (doi:10.1038/s41598-023-39956-z), 2023-08-10
Supplement: MOESM1 [file 41598_2023_39956_MOESM1_ESM%20%281%29.pdf]

# Supplementary Information

## Design of Metacontinua in the Aeroacoustic Spacetime

Giorgio Palma and Umberto Iemma

Roma Tre University, Department of Civil, Computer Science and Aeronautical Technologies  
Engineering, Rome, 00146, Italy

## A metafluid model for phase gradient metasurfaces

### Acoustic impedance model for a Helmholtz resonator

In the main article, an impedance model for the Helmholtz resonator cells is used. We report here some detail on its derivation. In the equation of motion of the mass-spring system, representing the resonator in Fig.S1, the displacement of the mass element  $y_n$  can be written as a function of the pressure perturbation on the neck section

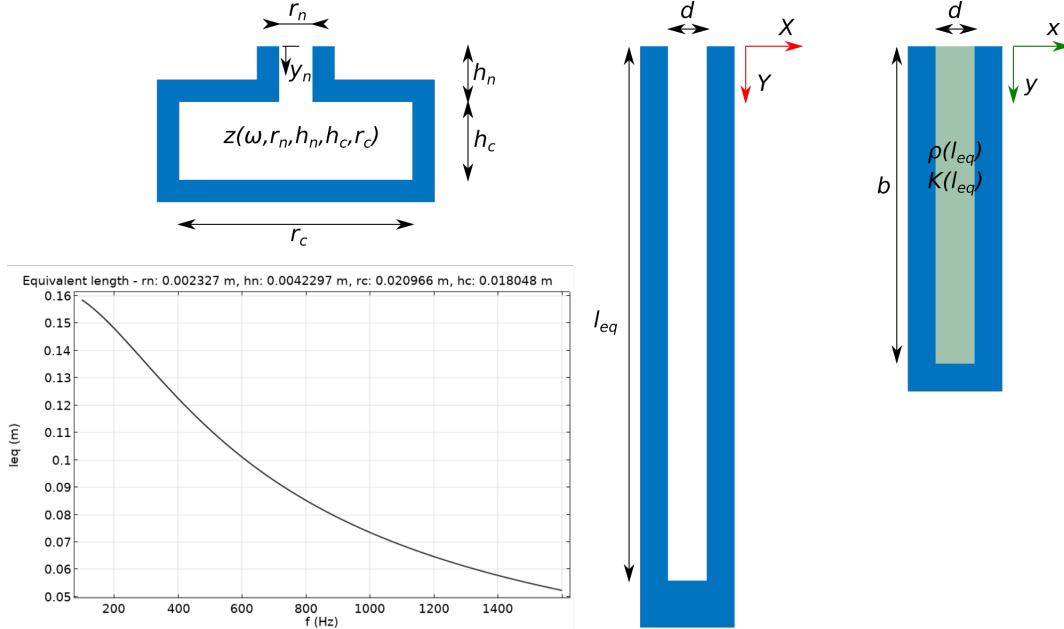

**Figure S1.** The design of the Helmholtz resonator defines its surface impedance, from which an equivalent length, function of frequency, for a straight duct with the same impedance can be derived. The properties of the metafluid are then evaluated, arbitrarily setting its domain thickness, using the procedure described in the article.

$$m \frac{d^2 y_n}{dt^2} = (p + \Delta p) r_n, \quad m = \rho_0 r_n \hat{h}_n \quad (S1)$$

Within the limit of small variations for the involved variables, we can write

$$m \frac{d^2 y_n}{dt^2} = p r_n + \frac{dp}{d\rho} (-\rho_0^2 dv) r_n \quad d\rho = -\rho_0^2 dv \quad (S2)$$

where  $\frac{dp}{d\rho} = c_0$  and  $dv = \frac{r_n y_n}{\rho_0 V}$ , with  $V = h_c r_c$ . Hence, substituting in the previous, the governing equation for the displacement  $y_n$  becomes

$$m \frac{d^2 y_n}{dt^2} + \frac{c_0^2 \rho_0 y_n r_n^2}{V} = p r_n \quad (S3)$$

Considering harmonic variations of the quantities  $p = \tilde{p}_n e^{i\omega t}$ ,  $y = \tilde{y}_n e^{i\omega t}$ , Eq.S3, and dropping the time exponential terms, one obtains

$$-\omega^2 m \tilde{y}_n + \frac{c_0^2 \rho_0 r_n^2}{V} \tilde{y}_n = \tilde{p}_n r_n \quad (S4)$$

Recalling that the acoustic particle velocity is  $\tilde{u} = i\omega \tilde{y}_n$ , the expression for the specific acoustic impedance is retrieved

$$z = \frac{1}{i\omega} \left( -\omega^2 \rho_0 \hat{h}_n + \frac{c_0^2 \rho_0 r_n}{h_c r_c} \right) \quad (S5)$$

The term  $\hat{h}_n$  is the length of the neck of the resonator, accounting for the end corrections as described by Bies & Calton for each side of the neck<sup>1,2</sup>

$$\hat{h}_n = h_n + 2 \left( 0.85 r_n \left( 1 - 1.33 \frac{r_n}{r_c} \right) \right) \quad (\text{S6})$$

## Design variables for PGMS cells

The HR and SC cells used have been designed through the optimization procedure described in<sup>3</sup>. Here, in Tab. S1 and Tab. S2, we report the values obtained for a set of eight cells for each type.

|            | #1 | #2     | #3     | #4     | #5     | #6     | #7     | #8   |
|------------|----|--------|--------|--------|--------|--------|--------|------|
| $r_n$ (mm) | 0  | 15.0   | 14.819 | 7.976  | 7.2855 | 5.9505 | 5.0    | 5.0  |
| $r_c$ (mm) | -  | 46.5   | 46.482 | 45.798 | 45.729 | 45.595 | 45.5   | 45.5 |
| $h_n$ (mm) | -  | 3.032  | 4.2043 | 3.8733 | 4.243  | 4.5    | 8.0613 | 22.5 |
| $h_c$ (mm) | -  | 27.288 | 37.838 | 34.859 | 38.187 | 40.5   | 36.939 | 22.5 |

**Table S1.** Optimized cells design parameters for HR-based PGMS metasurface, nominal  $\lambda^* = 0.19\text{m}$ .

|          | #1     | #2     | #3     | #4     | #5     | #6     | #7     | #8     |
|----------|--------|--------|--------|--------|--------|--------|--------|--------|
| $a$ (mm) | 16.447 | 13.863 | 15.935 | 17.276 | 19.947 | 19.828 | 19.632 | 14.567 |
| $b$ (mm) | 23.747 | 35.985 | 41.557 | 41.557 | 39.762 | 33.646 | 23.992 | 23.747 |
| $d$ (mm) | 2.0581 | 5.2973 | 8.4895 | 11.953 | 17.981 | 14.923 | 10.096 | 9.9737 |
| $t$ (mm) | 3.6502 | 4.9418 | 3.9057 | 3.2355 | 1.8998 | 1.9594 | 2.0576 | 4.59   |
| $n_w$    | 6      | 5      | 4      | 3      | 2      | 2      | 2      | 2      |
| $w$ (mm) | 1.8998 | 1.8998 | 1.8998 | 1.8998 | 1.8998 | 1.8998 | 1.8998 | 1.8998 |

**Table S2.** Optimized cells design parameters for SC-based PGMS metasurface, nominal  $\lambda^* = 0.19\text{m}$ .

## Additional results

### Space-coiling cells

We report in Figs. from S2 to S8 some additional results for the space-coiling cells, in terms of transmission coefficient.

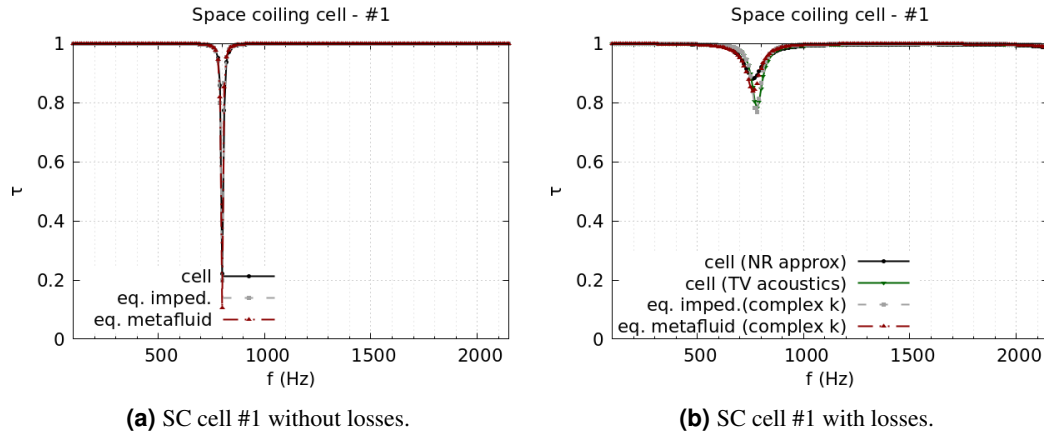

**Figure S2.** SC cells #1, comparison of transmission coefficient spectra between full geometry, equivalent impedance, and equivalent metafluid lossless simulations (a) and including thermoviscous losses (b). For the lossy case, narrow regions approximation (NR approx) and a full thermoviscous acoustic simulation (TV acoustics) are compared with the equivalent impedance and metafluid modelling with complex wavenumber (complex k).

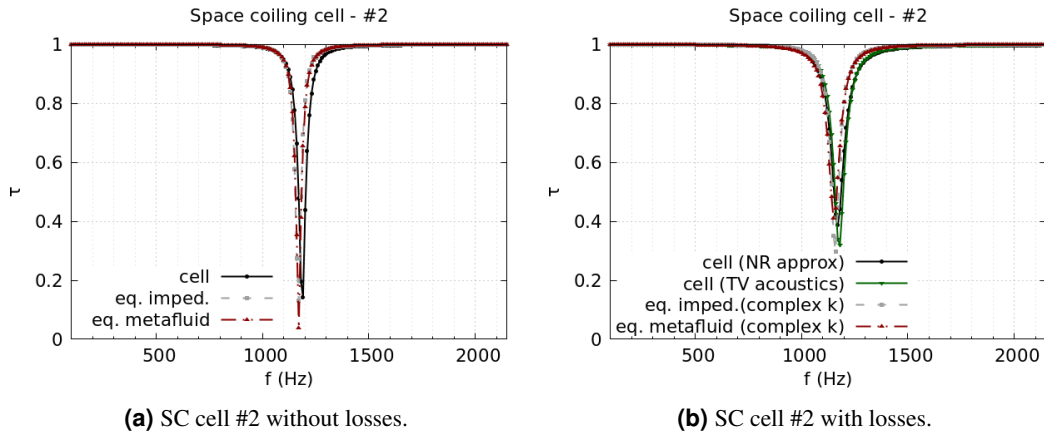

**Figure S3.** SC cells #2, comparison of transmission coefficient spectra between full geometry, equivalent impedance, and equivalent metafluid lossless simulations (a) and including thermoviscous losses (b). For the lossy case, narrow regions approximation (NR approx) and a full thermoviscous acoustic simulation (TV acoustics) are compared with the equivalent impedance and metafluid modelling with complex wavenumber (complex  $k$ ).

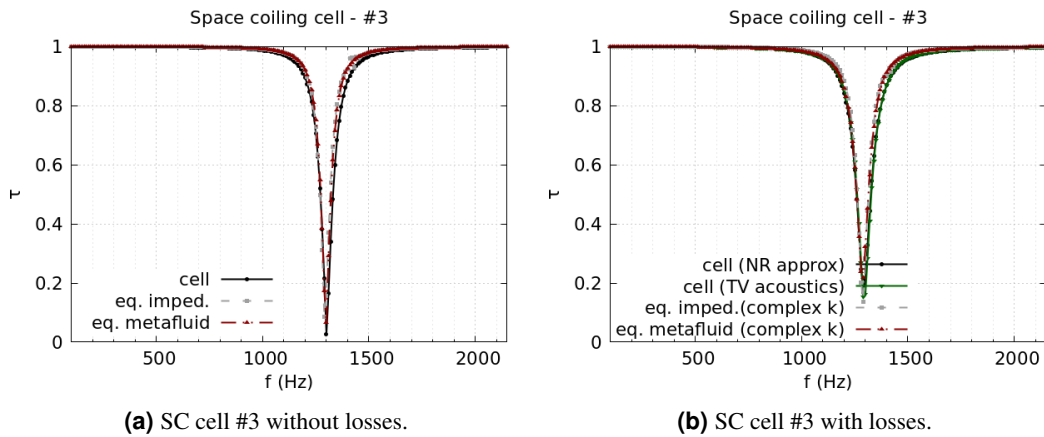

**Figure S4.** SC cells #3, comparison of transmission coefficient spectra between full geometry, equivalent impedance, and equivalent metafluid lossless simulations (a) and including thermoviscous losses (b). For the lossy case, narrow regions approximation (NR approx) and a full thermoviscous acoustic simulation (TV acoustics) are compared with the equivalent impedance and metafluid modelling with complex wavenumber (complex  $k$ ).

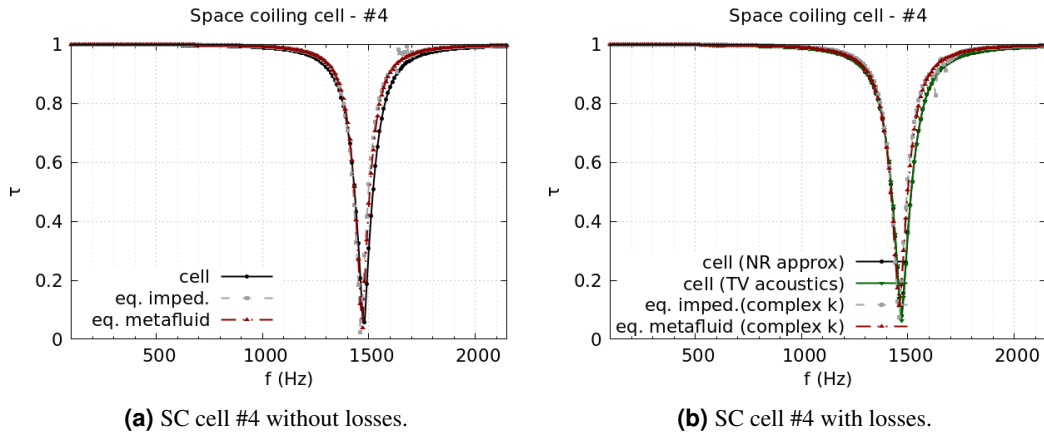

**Figure S5.** SC cells #4, comparison of transmission coefficient spectra between full geometry, equivalent impedance, and equivalent metafluid lossless simulations (a) and including thermoviscous losses (b). For the lossy case, narrow regions approximation (NR approx) and a full thermoviscous acoustic simulation (TV acoustics) are compared with the equivalent impedance and metafluid modelling with complex wavenumber (complex  $k$ ).

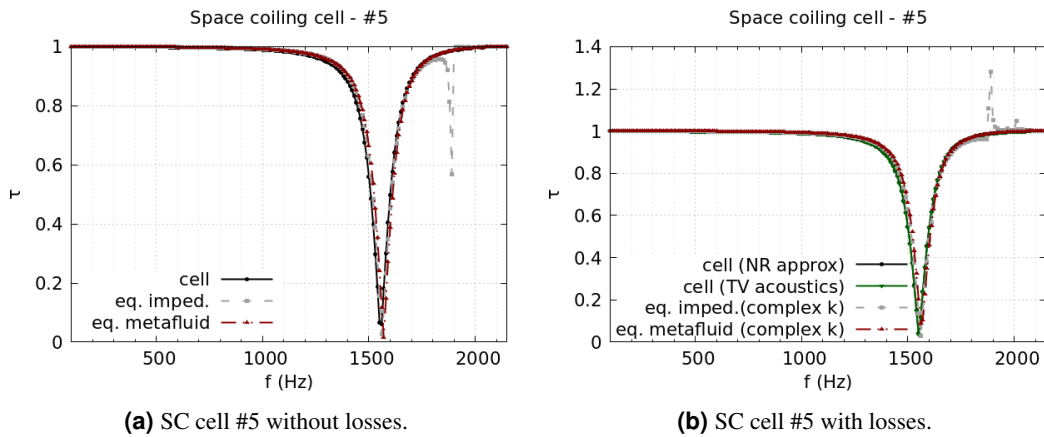

**Figure S6.** SC cells #5, comparison of transmission coefficient spectra between full geometry, equivalent impedance, and equivalent metafluid lossless simulations (a) and including thermoviscous losses (b). For the lossy case, narrow regions approximation (NR approx) and a full thermoviscous acoustic simulation (TV acoustics) are compared with the equivalent impedance and metafluid modelling with complex wavenumber (complex  $k$ ).

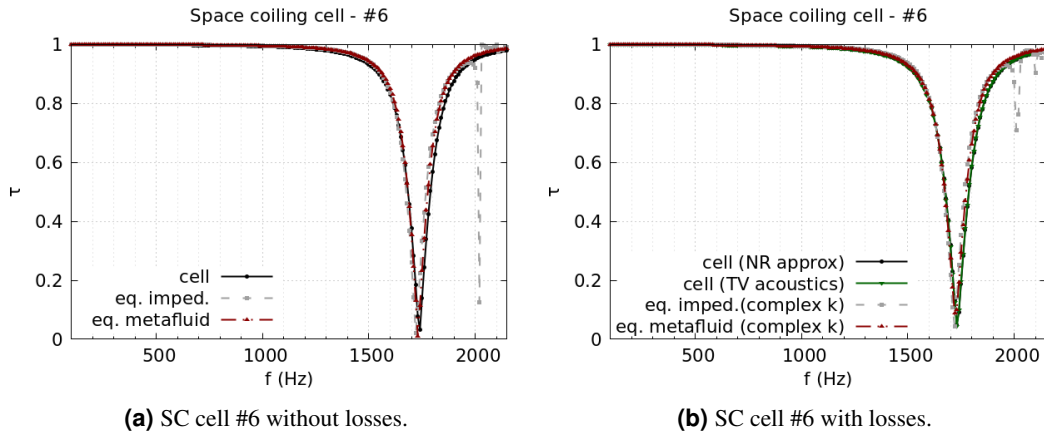

**Figure S7.** SC cells #6, comparison of transmission coefficient spectra between full geometry, equivalent impedance, and equivalent metafluid lossless simulations (a) and including thermoviscous losses (b). For the lossy case, narrow regions approximation (NR approx) and a full thermoviscous acoustic simulation (TV acoustics) are compared with the equivalent impedance and metafluid modelling with complex wavenumber (complex  $k$ ).

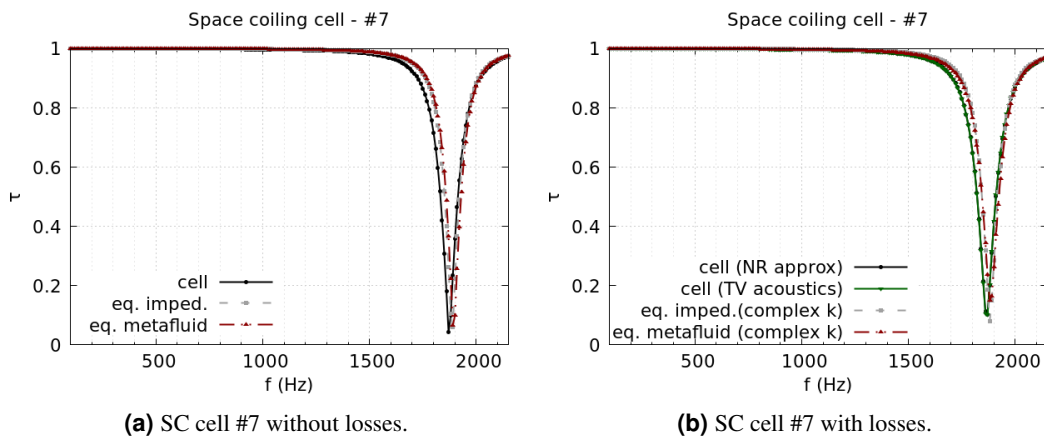

**Figure S8.** SC cells #7, comparison of transmission coefficient spectra between full geometry, equivalent impedance, and equivalent metafluid lossless simulations (a) and including thermoviscous losses (b). For the lossy case, narrow regions approximation (NR approx) and a full thermoviscous acoustic simulation (TV acoustics) are compared with the equivalent impedance and metafluid modelling with complex wavenumber (complex  $k$ ).

### Helmholtz resonator cells

In Figs. from [S9](#) to [S14](#), we report the results in terms of transmission loss for some of the Helmholtz Resonator cells

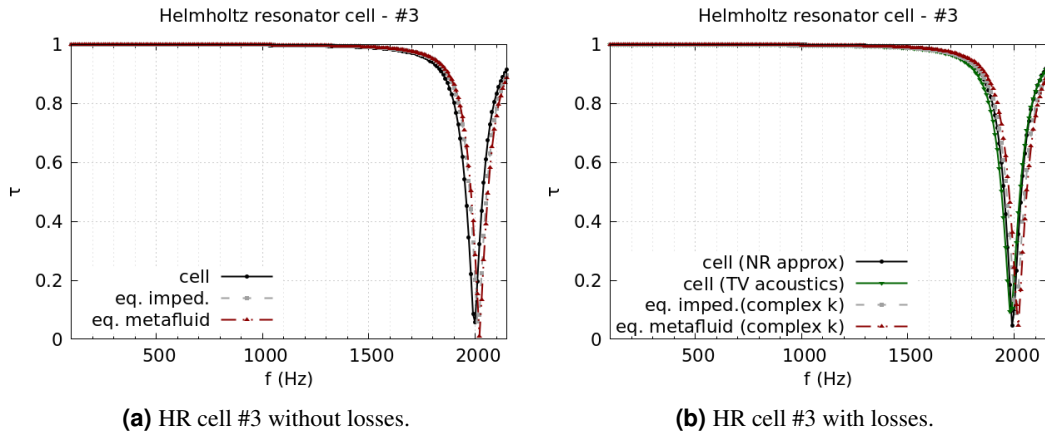

**Figure S9.** HR cells #3, comparison of transmission coefficient spectra between full geometry, equivalent impedance, and equivalent metafluid lossless simulations (a) and including thermoviscous losses (b). For the lossy case, narrow regions approximation (NR approx) and a full thermoviscous acoustic simulation (TV acoustics) are compared with the equivalent impedance and metafluid modelling with complex wavenumber (complex  $k$ ).

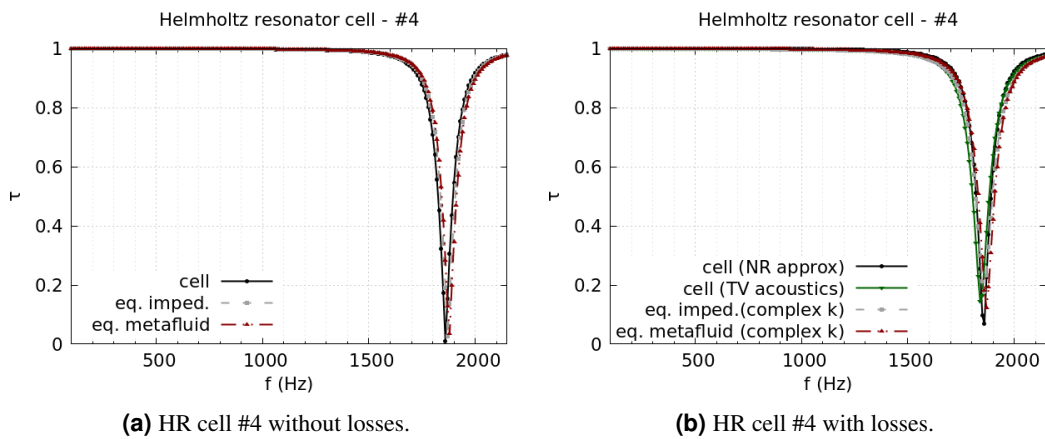

**Figure S10.** HR cells #4, comparison of transmission coefficient spectra between full geometry, equivalent impedance, and equivalent metafluid lossless simulations (a) and including thermoviscous losses (b). For the lossy case, narrow regions approximation (NR approx) and a full thermoviscous acoustic simulation (TV acoustics) are compared with the equivalent impedance and metafluid modelling with complex wavenumber (complex  $k$ ).

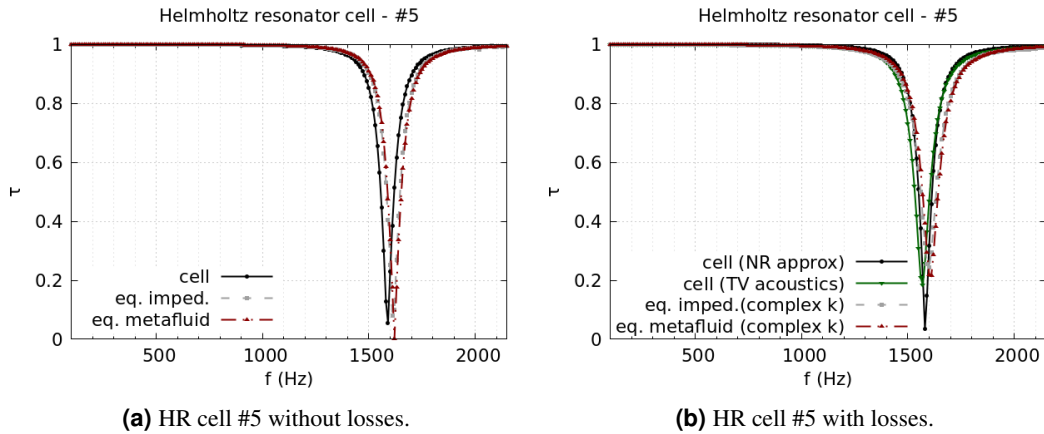

**Figure S11.** HR cells #5, comparison of transmission coefficient spectra between full geometry, equivalent impedance, and equivalent metafluid lossless simulations (a) and including thermoviscous losses (b). For the lossy case, narrow regions approximation (NR approx) and a full thermoviscous acoustic simulation (TV acoustics) are compared with the equivalent impedance and metafluid modelling with complex wavenumber (complex  $k$ ).

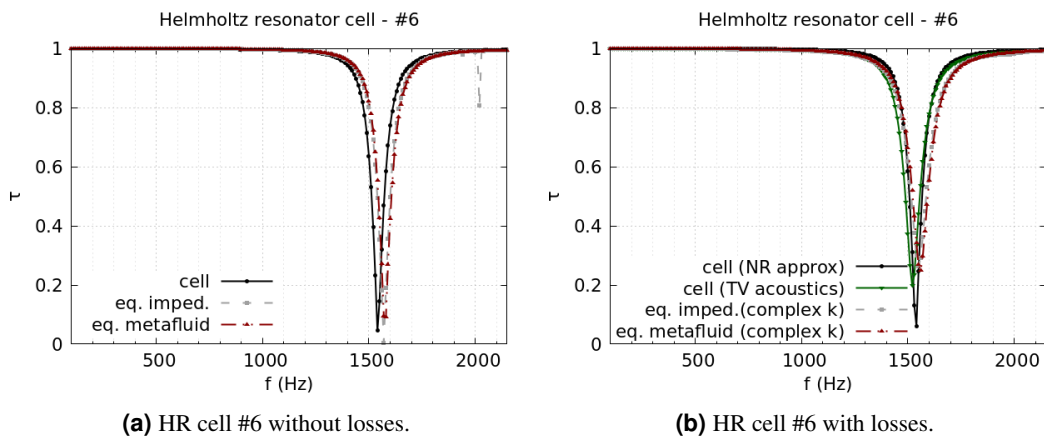

**Figure S12.** HR cells #6, comparison of transmission coefficient spectra between full geometry, equivalent impedance, and equivalent metafluid lossless simulations (a) and including thermoviscous losses (b). For the lossy case, narrow regions approximation (NR approx) and a full thermoviscous acoustic simulation (TV acoustics) are compared with the equivalent impedance and metafluid modelling with complex wavenumber (complex  $k$ ).



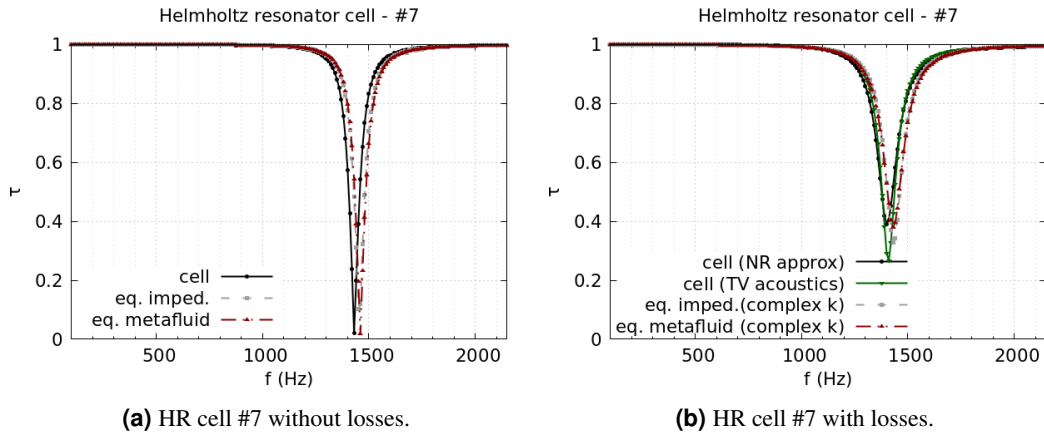

**Figure S13.** HR cells #7, comparison of transmission coefficient spectra between full geometry, equivalent impedance, and equivalent metafluid lossless simulations (a) and including thermoviscous losses (b). For the lossy case, narrow regions approximation (NR approx) and a full thermoviscous acoustic simulation (TV acoustics) are compared with the equivalent impedance and metafluid modelling with complex wavenumber (complex  $k$ ).

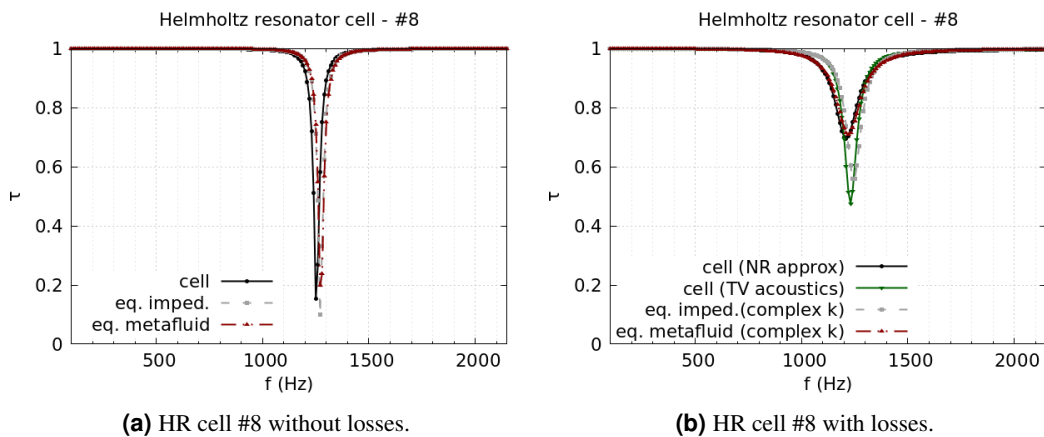

**Figure S14.** HR cells #8, comparison of transmission coefficient spectra between full geometry, equivalent impedance, and equivalent metafluid lossless simulations (a) and including thermoviscous losses (b). For the lossy case, narrow regions approximation (NR approx) and a full thermoviscous acoustic simulation (TV acoustics) are compared with the equivalent impedance and metafluid modelling with complex wavenumber (complex  $k$ ).

## References

1. Bies, D. & Hansen, C. *Engineering Noise Control: Theory and Practice, Fourth Edition* (Taylor & Francis, 2009).
2. Calton, M. F. & Sommerfeldt, S. D. Modeling acoustic resonators: From theory to application. In *INTER-NOISE and NOISE-CON Congress and Conference Proceedings*, vol. 250, 3184–3191 (Institute of Noise Control Engineering, 2015).
3. Palma, G., Cioffi, I., Centracchio, F., Burghignoli, L. & Iemma, U. *Steering of Acoustic Reflection from Metasurfaces through Numerical Optimization* (2019).
